# Supplementary material for: Deep Learning-Based Mapping of Tumor Infiltrating Lymphocytes in Whole Slide Images of 23 Types of Cancer
Source: PubMed Central journal article supplement (PMC8889499; doi:10.3389/fonc.2021.806603), 2022-02-16
Supplement: DataSheet_1.pdf [file DataSheet_1.pdf]

# Deep Learning-based Mapping of Tumor Infiltrating Lymphocytes in Whole Slide Images of 23 Types of Cancer - Supplementary Material

## 1 SUPPLEMENTARY FIGURES

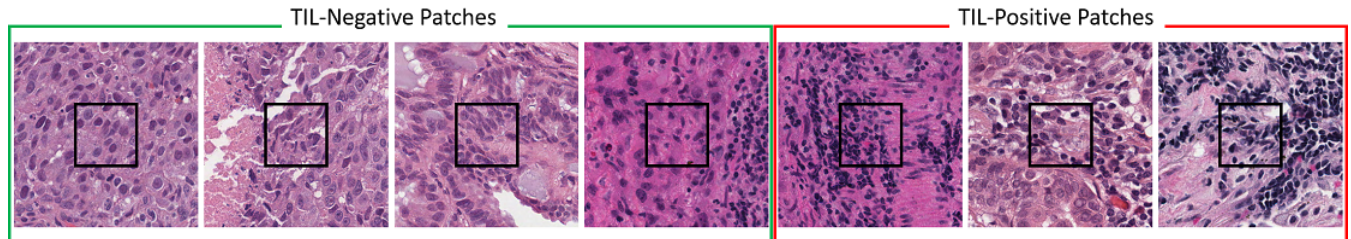

**Figure S1.** Samples of manually annotated patches. They are labeled TIL-positive if there are lymphocytes or plasma cells present in the center square region (sub-patch). Only the sub-patch is used in training. The larger area provides context to pathologists during annotation.

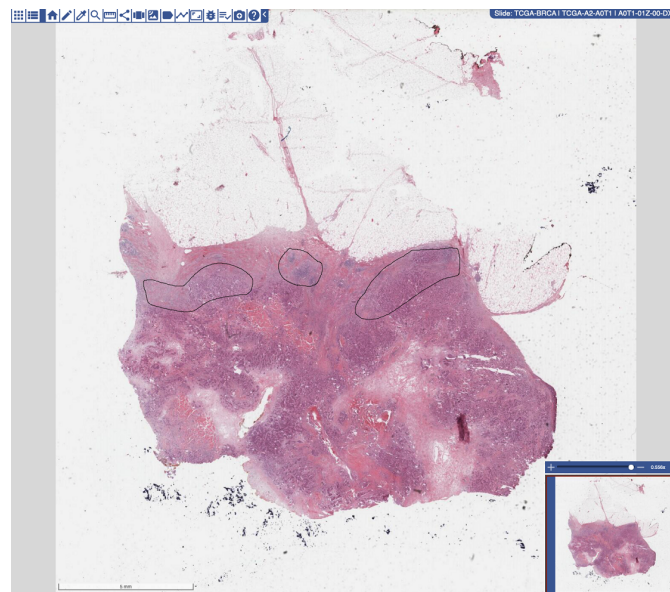

**Figure S2.** Markup and annotation tool that can be used to annotate multiple regions and classes in a whole slide tissue image. These annotations can be used to create training datasets for deep learning classification models.

## 2 SUPPLEMENTARY TABLES

Table S1 show the number of training patches per cancer type and Table S2 shows the number of patches and superpatches per cancer type in the test set.

| Cancer Type | TIL Pos. | TIL Neg. | Total | Cancer Type | TIL Pos. | TIL Neg. | Total |
|-------------|----------|----------|-------|-------------|----------|----------|-------|
| ACC         | 573      | 31952    | 32525 | BRCA        | 1674     | 4930     | 6604  |
| CESC        | 3116     | 10028    | 13144 | COAD        | 2035     | 1947     | 3982  |
| ESCA        | 4245     | 10637    | 14882 | HNSC        | 4748     | 12136    | 16884 |
| KIRC        | 2017     | 27300    | 29317 | LIHC        | 2014     | 14645    | 16659 |
| LUAD        | 5233     | 27142    | 32375 | LUSC        | 6406     | 19218    | 25624 |
| MESO        | 1283     | 9517     | 10800 | OV          | 651      | 21184    | 21835 |
| PAAD        | 1121     | 4452     | 5573  | PRAD        | 686      | 4842     | 5528  |
| READ        | 1210     | 3533     | 4743  | SARC        | 1310     | 18538    | 19848 |
| SKCM        | 10548    | 23515    | 34063 | STAD        | 6743     | 16515    | 23258 |
| TGCT        | 2347     | 16205    | 18552 | THYM        | 4235     | 2983     | 7218  |
| UCEC        | 1267     | 4153     | 5420  | UVM         | 39       | 2399     | 2438  |

**Table S1.** The number of labelled positive and negative patches per cancer type in the training set.

| Cancer Type | Patches Count | Superpatches Count | Cancer Type | Patches Count | Superpatches Count |
|-------------|---------------|--------------------|-------------|---------------|--------------------|
| ACC         | 20            | 147                | BRCA        | 327           | 348                |
| CESC        | 57            | 61                 | COAD        | 78            | 65                 |
| ESCA        | -             | 312                | HNSC        | 13            | 324                |
| KIRC        | 63            | 319                | LIHC        | 61            | 248                |
| LUAD        | 299           | 63                 | LUSC        | 76            | 65                 |
| MESO        | -             | 271                | OV          | 299           | 158                |
| PAAD        | 80            | 440                | PRAD        | 67            | 66                 |
| READ        | 69            | 62                 | SARC        | 326           | 299                |
| SKCM        | 82            | 67                 | STAD        | 72            | 63                 |
| TGCT        | -             | 303                | THYM        | -             | 324                |
| UCEC        | 65            | 64                 | UVM         | -             | 66                 |

**Table S2.** The number of labelled patches and superpatches in the test set.
